# Supplementary material for: Effect of halide solid solution on the structure, phase transition behaviour and dielectric properties of dabcoH+ chains
Source: Royal Society of Chemistry journal article supplement (doi:10.1039/d4ce00310a), 2024-01-01
Supplement: d4ce00310a1.pdf [file d4ce00310a1.pdf]

## Electronic Supplementary Information(ESI)

# Effect of halide solid solution on the structure, phase transition behaviour and dielectric properties of dabcoH<sup>+</sup> chains

Yuki Ohishi,<sup>a</sup> Kohei Sambe,<sup>b</sup> Shun Dekura,<sup>b,c</sup> Tomoyuki Akutagawa,<sup>b,c</sup>  
Atsuko Masuya-Suzuki,<sup>a,d</sup> and Ryo Tsunashima\*<sup>a,d</sup>

<sup>a</sup>Graduate School of Sciences and Technology for Innovation, Yamaguchi University,  
Yoshida 1677-1, Yamaguchi, 753-8512, Japan.

<sup>b</sup>Graduate School of Engineering, Tohoku University, Sendai 980-8577, Japan.

<sup>c</sup>Institute of Multidisciplinary Research for Advanced Materials (IMRAM), Tohoku  
University, Sendai 980-8577, Japan

<sup>d</sup>Chemistry Course, Faculty of Science, Yamaguchi University, Yoshida 1677-1,  
Yamaguchi, Japan

### Table of contents

1. SEM-EDS
2. PXRD pattern (solid solution **ClBr**).
3. SC-XRD (**ClBr**)
4. PXRD before and after heating (**Cl<sub>0.03</sub>Br<sub>0.97</sub>**)
5. SC-XRD (solid solution **BrI**). About the anion site.
6. SC-XRD (dabcoHBr and solid solution **Br<sub>0.80</sub>I<sub>0.20</sub>**). Uniformity of the structure of each crystal.
7. SC-XRD (solid solution **Br<sub>0.80</sub>I<sub>0.20</sub>**). Temperature dependence.
8. DFT
9. *P-E* Hysteresis
10. Temperature-variable PXRD (solid solution **Br<sub>0.80</sub>I<sub>0.20</sub>**)
11. DSC and temperature-variable PXRD (solid solution **Br<sub>0.19</sub>I<sub>0.81</sub>**)
12. Solid solution preparation and crystal images

# 1. SEM-EDS

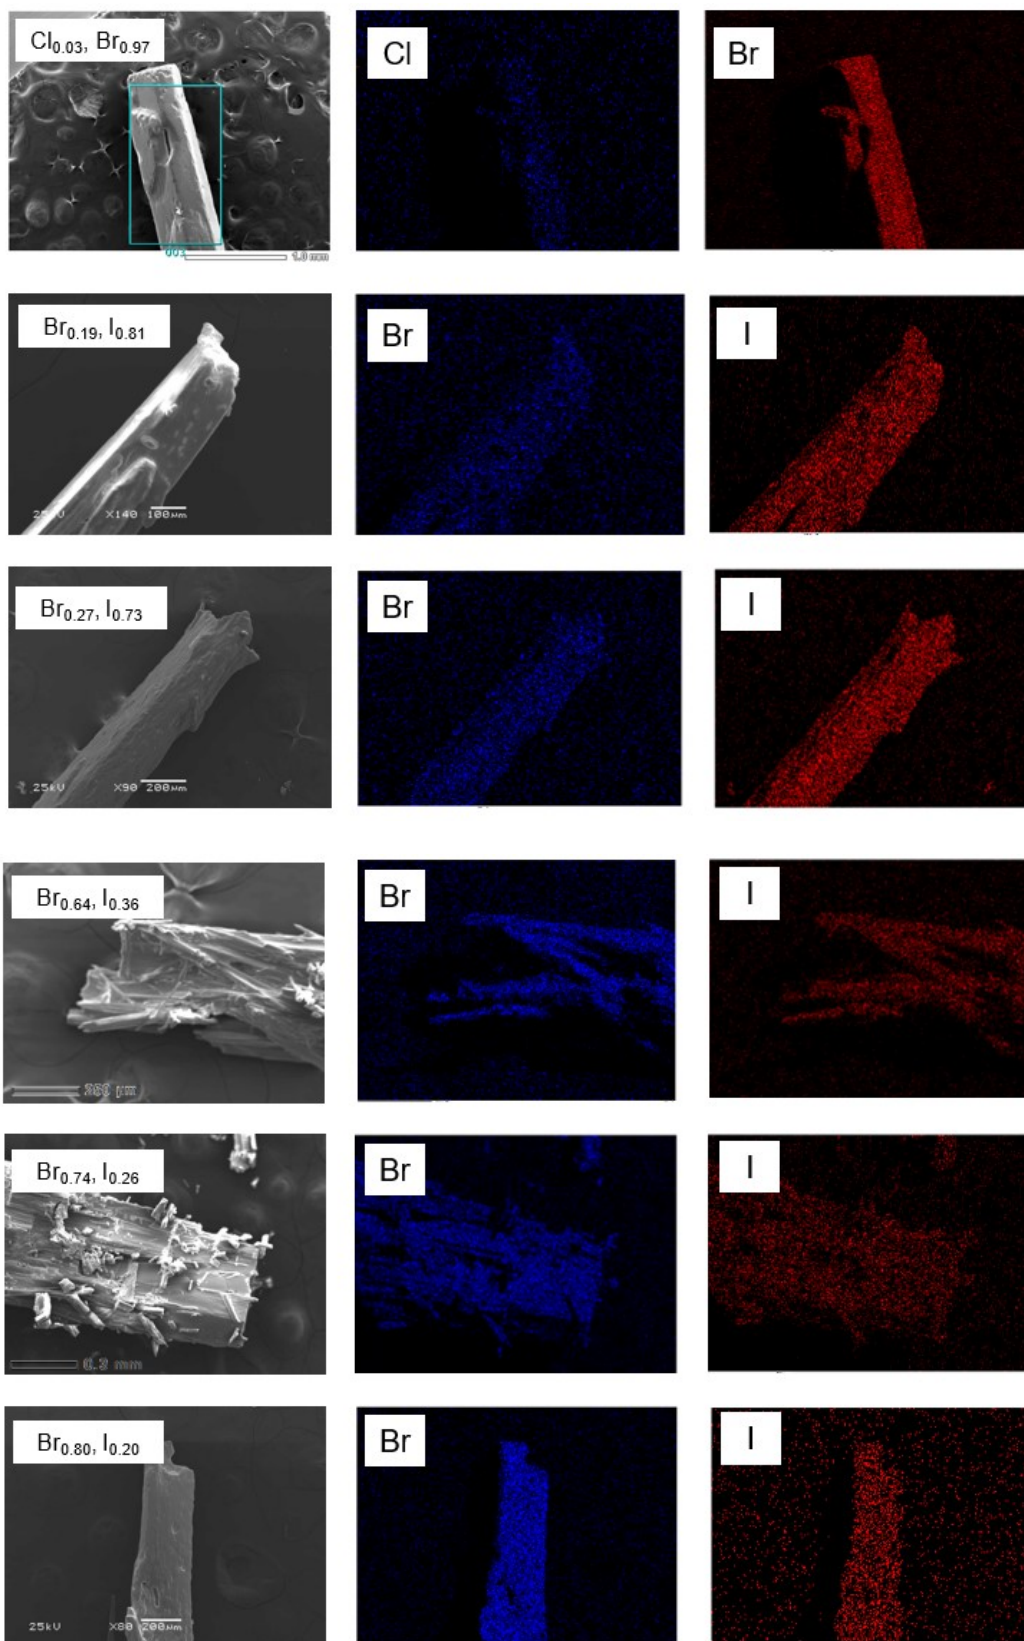

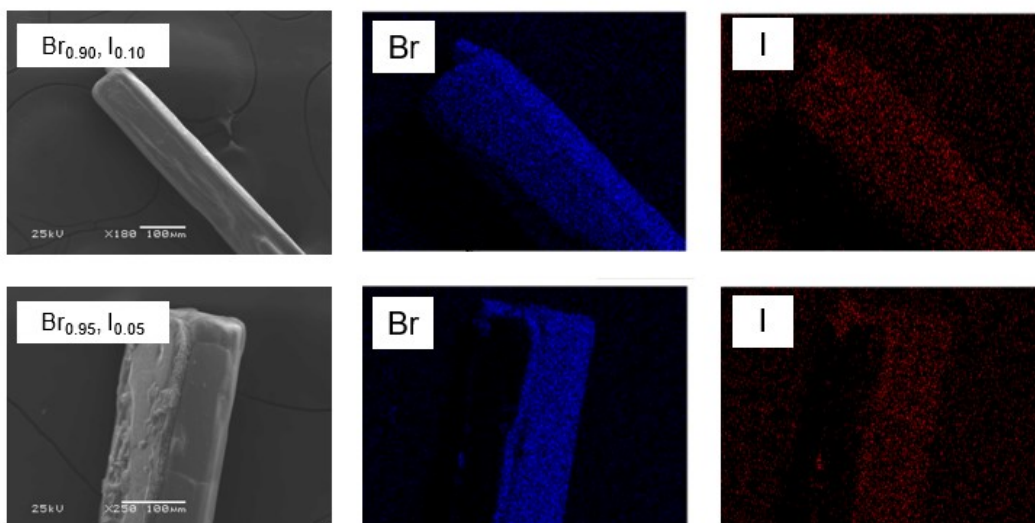

**Fig. S1** SEM images and energy-dispersive X-ray spectroscopy (EDS) mapping diagrams were obtained using single crystals. In the solid solution **ClBr**, blue indicates Cl, and red indicates Br. In the solid solution **BrI**, blue indicates Br, and red indicates I.

## 2. PXRD pattern (solid solution **ClBr**).

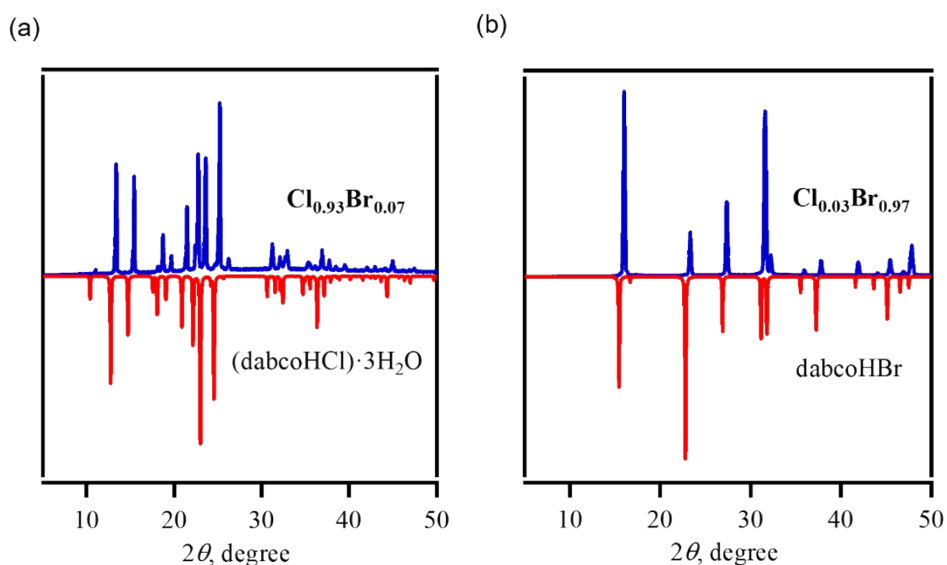

**Fig. S2** The simulated and powdered XRD patterns from single-crystal X-ray structural analysis. (a)  $\text{Cl}_{0.93}\text{Br}_{0.07}$  in solid solution **ClBr** and  $(\text{dabcoHCl}) \cdot 3\text{H}_2\text{O}$ ; (b)  $\text{Cl}_{0.03}\text{Br}_{0.97}$  in solid solution **ClBr** and  $\text{dabcoHBr}$ .

### 3. SC-XRD (solid solution $\text{ClBr}$ )

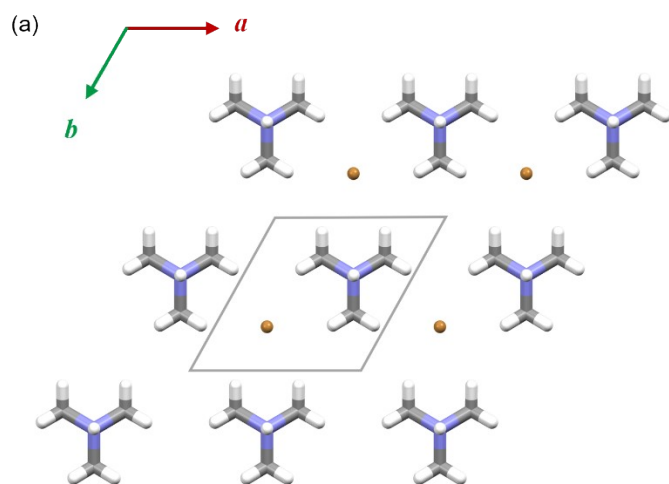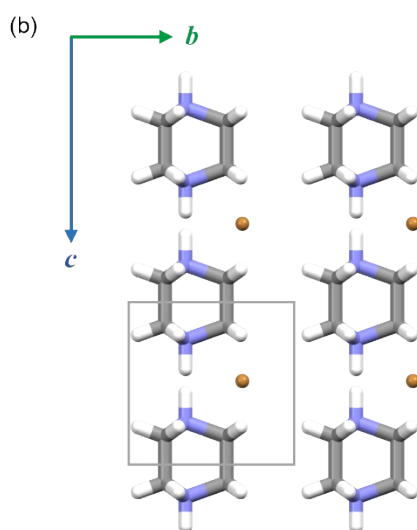

| Compound                                  | $\text{Cl}_{0.03}\text{Br}_{0.97}$                                  |
|-------------------------------------------|---------------------------------------------------------------------|
| Formula                                   | $\text{C}_6\text{H}_{13}\text{N}_2\text{Cl}_{0.03}\text{Br}_{0.97}$ |
| T, K                                      | 298                                                                 |
| C.S.                                      | Hexagonal                                                           |
| S.G.                                      | $P-6m2$                                                             |
| $a$ , Å                                   | 6.6645(5)                                                           |
| $c$ , Å                                   | 5.3238(4)                                                           |
| $V$ , Å <sup>3</sup>                      | 204.78(3)                                                           |
| $Z$                                       | 1                                                                   |
| $\rho_{\text{calc}}$ , g cm <sup>-3</sup> | 1.555                                                               |
| Reflections collected                     | 1438                                                                |
| Independent reflections                   | 236                                                                 |
| Data/restraints/parameter                 | 236/0/12                                                            |
| $s$                                       |                                                                     |
| Goodness of fit on $F_2$                  | 1.161                                                               |
| Final R indices [ $I \geq 2\sigma(I)$ ]   | $R_1 = 0.0333$<br>$wR_2 = 0.0842$                                   |
| Final R indices [all data]                | $R_1 = 0.351$<br>$wR_2 = 0.0846$                                    |

**Fig. S3** Single-crystal X-ray structure of solid solution  $\text{Cl}_{0.03}\text{Br}_{0.97}$ . (a)  $ab$ -plane, (b)  $bc$ -plane and crystallographic data.

### 4. PXRD before and after heating ( $\text{Cl}_{0.03}\text{Br}_{0.97}$ )

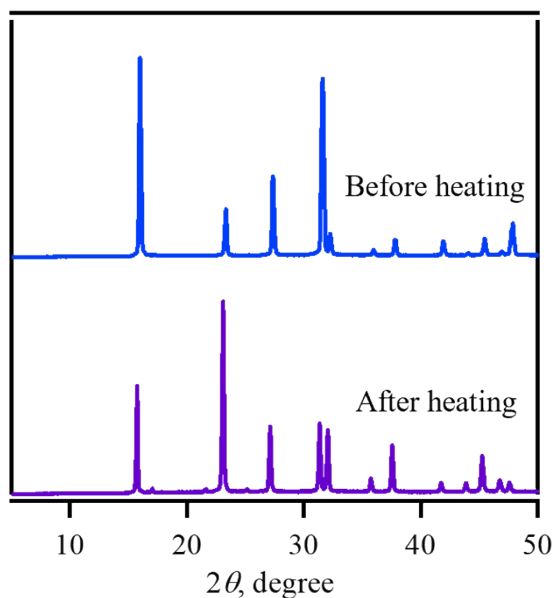

**Fig. S4** XRD patterns at 298 K before and after heating of the  $\text{Cl}_{0.03}\text{Br}_{0.97}$ .

### 5. SC-XRD (solid solution **BrI**). About the anion site.

**Table S1** Occupancy optimisation (lower panel) and elemental analysis values (upper panel) at anion sites in single-crystal X-ray structural analysis.

|        |         |         |         |         |         |         |         |
|--------|---------|---------|---------|---------|---------|---------|---------|
| E. A.  | 19 : 81 | 27 : 73 | 64 : 36 | 74 : 26 | 80 : 20 | 90 : 10 | 95 : 05 |
| SC-XRD | 17 : 83 | 27 : 73 | 62 : 38 | 73 : 27 | 81 : 19 | 93 : 07 | 98 : 02 |

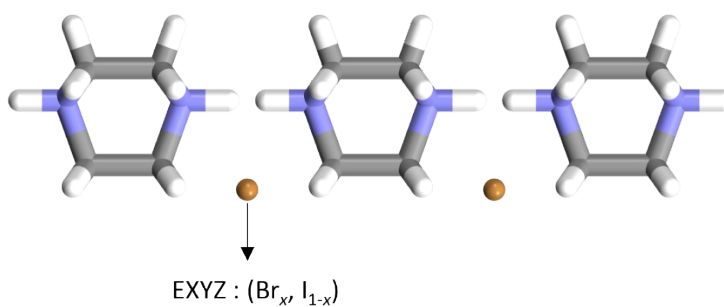

Optimisation was performed by setting the solid solution anions at the same site and the Br-to-I ratio to 1.

Composition dependence of C(-H)···X distance.

Fig. S5 shows the composition dependence of the C...X distance. The C...X distances show a linear variation with composition. The typical C(-H)...Br distance is shown in purple and the C(-H)...I distance is in green dotted lines.<sup>[1]</sup> All solid solution C...X distances are longer than typical C(-H)...Br distances, indicating that C-H...Br interactions are weak in solid solutions. On the other hand, for  $x \geq 0.64$  the C...X distances are shorter than typical C(-H)...I distances, which indicates CH...I interactions are strong.

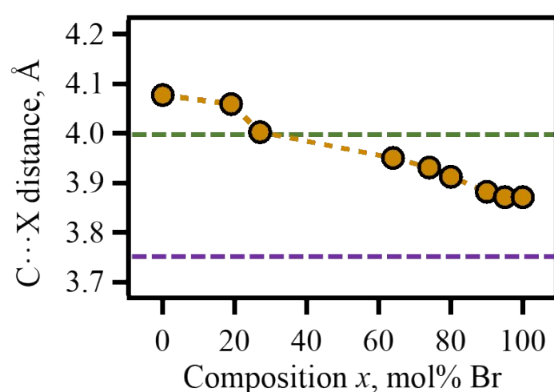

**Fig. S5** Plot of C...X distance with  $x$ . Purple and green dotted lines represent typical C...Br<sup>-</sup> and C...I<sup>-</sup> distances.<sup>[1]</sup>

6. SC-XRD (dabcoHBr and solid solution **Br<sub>0.80</sub>I<sub>0.20</sub>**). Uniformity of the structure of each crystal.

**Table S2** Mean and standard deviation of dabcoHBr and the solid solution **Br<sub>0.80</sub>I<sub>0.20</sub>**.

|                                                  | Mean   | $\sigma$ |
|--------------------------------------------------|--------|----------|
| $a$ (Br)                                         | 6.6649 | 0.0163   |
| $c$ (Br)                                         | 5.3150 | 0.0569   |
| $a$ ( <b>Br<sub>0.80</sub>I<sub>0.20</sub></b> ) | 6.7323 | 0.0172   |
| $c$ ( <b>Br<sub>0.80</sub>I<sub>0.20</sub></b> ) | 5.3246 | 0.00615  |

## 7. SC-XRD (solid solution $\text{Br}_{0.80}\text{I}_{0.20}$ ). Temperature dependence.

**Table S3** Crystallographic data for  $\text{Br}_{0.80}\text{I}_{0.20}$ . Temperature dependence.

| Compound                                  | $\text{Br}_{0.80}\text{I}_{0.20}$                                  |                                   |                                   |                                   |                                   |                                   |                                   |
|-------------------------------------------|--------------------------------------------------------------------|-----------------------------------|-----------------------------------|-----------------------------------|-----------------------------------|-----------------------------------|-----------------------------------|
| Formula                                   | $\text{C}_6\text{H}_{13}\text{N}_2\text{Br}_{0.80}\text{I}_{0.20}$ |                                   |                                   |                                   |                                   |                                   |                                   |
| T, K                                      | 112                                                                | 158                               | 205                               | 250                               | 275                               | 298                               | 317                               |
| C.S.                                      | Hexagonal                                                          |                                   |                                   |                                   |                                   |                                   |                                   |
| S.G.                                      | $P-6m2$                                                            |                                   |                                   |                                   |                                   |                                   |                                   |
| $a$ , Å                                   | 6.7014(5)                                                          | 6.7111(5)                         | 6.7200(5)                         | 6.7378(5)                         | 6.7561(6)                         | 6.7541(6)                         | 6.7627(6)                         |
| $c$ , Å                                   | 5.3164(3)                                                          | 5.3194(3)                         | 5.3205(3)                         | 5.3315(4)                         | 5.3430(4)                         | 5.333(4)                          | 5.3437(4)                         |
| $V$ , Å <sup>3</sup>                      | 206.77(3)                                                          | 207.48(3)                         | 208.08(3)                         | 209.61(3)                         | 211.21(4)                         | 210.90(4)                         | 211.65(4)                         |
| Z                                         | 1                                                                  |                                   |                                   |                                   |                                   |                                   |                                   |
| $\rho_{\text{calc}}$ , g cm <sup>-3</sup> | 1.626                                                              | 1.621                             | 1.616                             | 1.604                             | 1.592                             | 1.594                             | 1.589                             |
| Reflections collected                     | 1173                                                               | 1047                              | 1061                              | 994                               | 981                               | 941                               | 911                               |
| Independent reflections                   | 229                                                                | 230                               | 230                               | 231                               | 231                               | 231                               | 231                               |
| Data/restraints/parameters                | 229/0/13                                                           | 230/0/12                          | 230/0/12                          | 231/0/12                          | 231/0/12                          | 231/0/12                          | 231/0/12                          |
| Goodness of fit on $F_2$                  | 1.141                                                              | 1.102                             | 1.157                             | 1.126                             | 1.122                             | 1.114                             | 1.110                             |
| Final R indices [ $I \geq 2\sigma(I)$ ]   | $R_1 = 0.0313$<br>$wR_2 = 0.0715$                                  | $R_1 = 0.0348$<br>$wR_2 = 0.0845$ | $R_1 = 0.0333$<br>$wR_2 = 0.0780$ | $R_1 = 0.0221$<br>$wR_2 = 0.0460$ | $R_1 = 0.0379$<br>$wR_2 = 0.0898$ | $R_1 = 0.0389$<br>$wR_2 = 0.0930$ | $R_1 = 0.0345$<br>$wR_2 = 0.0800$ |
| Final R indices [all data]                | $R_1 = 0.313$<br>$wR_2 = 0.0715$                                   | $R_1 = 0.0348$<br>$wR_2 = 0.0845$ | $R_1 = 0.0333$<br>$wR_2 = 0.0780$ | $R_1 = 0.0221$<br>$wR_2 = 0.0460$ | $R_1 = 0.0379$<br>$wR_2 = 0.0898$ | $R_1 = 0.0394$<br>$wR_2 = 0.0933$ | $R_1 = 0.0352$<br>$wR_2 = 0.0803$ |

| Compound                               | Br <sub>0.80</sub> I <sub>0.20</sub>                                               |                             |                             |                             |                             |                              |                             |                             |
|----------------------------------------|------------------------------------------------------------------------------------|-----------------------------|-----------------------------|-----------------------------|-----------------------------|------------------------------|-----------------------------|-----------------------------|
| Formula                                | C <sub>6</sub> H <sub>13</sub> N <sub>2</sub> Br <sub>0.80</sub> I <sub>0.20</sub> |                             |                             |                             |                             |                              |                             |                             |
| T, K                                   | 326                                                                                | 336                         | 340                         | 345                         | 350                         | 354                          | 364                         | 373                         |
| C.S.                                   | Hexagonal                                                                          |                             |                             |                             |                             |                              |                             |                             |
| S.G.                                   | P-6m2                                                                              |                             |                             |                             |                             |                              |                             |                             |
| a, Å                                   | 6.7647(7)                                                                          | 6.7667(7)                   | 6.7670(8)                   | 6.7670(8)                   | 6.7705(8)                   | 6.7733(8)                    | 6.7773(8)                   | 6.7800(8)                   |
| c, Å                                   | 5.3453(5)                                                                          | 5.3437(5)                   | 5.3435(5)                   | 5.3435(5)                   | 5.3460(5)                   | 5.3446(5)                    | 5.3488(5)                   | 5.3483(6)                   |
| V, Å <sup>3</sup>                      | 212.84(5)                                                                          | 211.90(5)                   | 211.91(5)                   | 211.91(5)                   | 212.23(5)                   | 212.35(5)                    | 212.77(5)                   | 212.91(6)                   |
| Z                                      | 1                                                                                  |                             |                             |                             |                             |                              |                             |                             |
| ρ <sub>calc</sub> , g cm <sup>-3</sup> | 1.587                                                                              | 1.587                       | 1.587                       | 1.587                       | 1.584                       | 1.583                        | 1.580                       | 1.579                       |
| Reflections collected                  | 1261                                                                               | 1264                        | 1259                        | 1259                        | 1264                        | 1250                         | 1254                        | 1254                        |
| Independent reflections                | 231                                                                                | 231                         | 231                         | 231                         | 233                         | 232                          | 233                         | 232                         |
| Data/restraints/parameters             | 231/0/12                                                                           | 231/0/12                    | 231/0/12                    | 231/0/12                    | 233/0/12                    | 232/0/12                     | 233/0/12                    | 232/0/12                    |
| Goodness of fit on F <sub>2</sub>      | 1.126                                                                              | 1.104                       | 1.110                       | 1.111                       | 1.137                       | 1.133                        | 1.118                       | 1.098                       |
|                                        | R <sub>1</sub> = 0.0357                                                            | R <sub>1</sub> = 0.0341     | R <sub>1</sub> = 0.0378     | R <sub>1</sub> = 0.0378     | R <sub>1</sub> = 0.0361     | R <sub>1</sub> = 0.0379      | R <sub>1</sub> = 0.0362     | R <sub>1</sub> = 0.0329     |
| Final R indices [I ≥ 2σ(I)]            | wR <sub>2</sub> =<br>0.0833                                                        | wR <sub>2</sub> =<br>0.0831 | wR <sub>2</sub> =<br>0.0906 | wR <sub>2</sub> =<br>0.0907 | wR <sub>2</sub> =<br>0.0911 | wR <sub>2</sub> =<br>0.0941  | wR <sub>2</sub> =<br>0.0886 | wR <sub>2</sub> =<br>0.0793 |
|                                        | R <sub>1</sub> = 0.0362                                                            | R <sub>1</sub> = 0.0362     | R <sub>1</sub> = 0.0392     | R <sub>1</sub> = 0.0392     | R <sub>1</sub> = 0.0386     | R <sub>1</sub> = 0.0422      | R <sub>1</sub> = 0.0403     | R <sub>1</sub> = 0.0374     |
| Final R indices [all data]             | wR <sub>2</sub> =<br>0.0836                                                        | wR <sub>2</sub> =<br>0.0837 | wR <sub>2</sub> =<br>0.0912 | wR <sub>2</sub> =<br>0.0913 | wR <sub>2</sub> =<br>0.0925 | wR <sub>2</sub> =<br>=0.0979 | wR <sub>2</sub> =<br>0.0907 | wR <sub>2</sub> =<br>0.0811 |



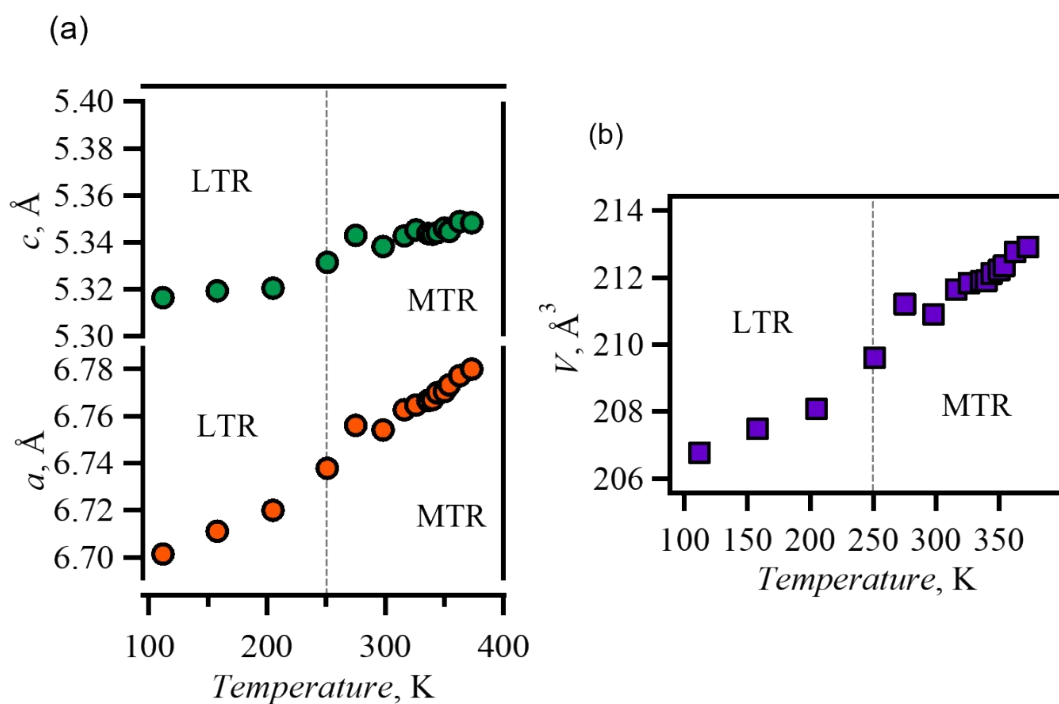

**Fig. S6** Temperature dependence of the lattice length (a) and lattice volume (b) in solid solution  $\text{Br}_{0.80}\text{I}_{0.20}$ .

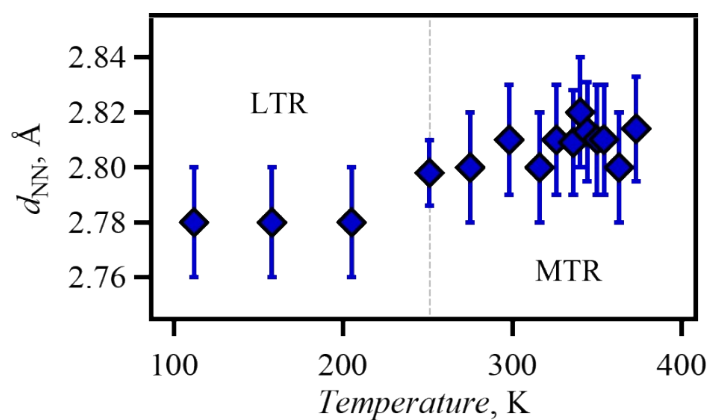

**Fig. S7** Temperature dependence of N...N distance in solid solution  $\text{Br}_{0.80}\text{I}_{0.20}$

## 8. DFT

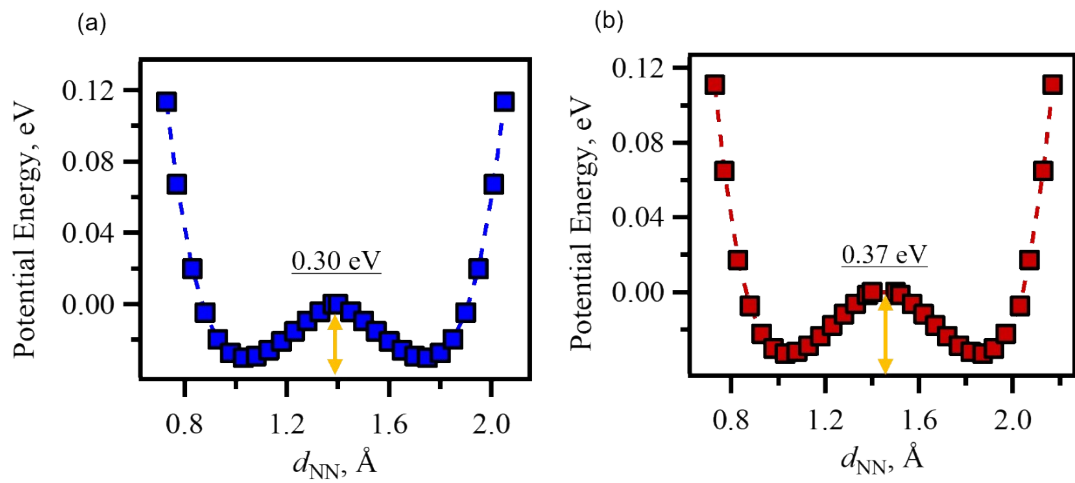

**Fig. S8** The activation barriers for proton motility were calculated using DFT. (a) LTR  
(b) MTR.

## 9. $P$ - $E$ hysteresis

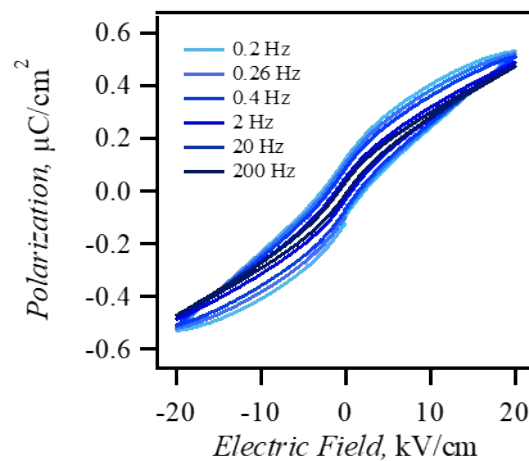

**Fig. S9** Temperature dependence of  $P$ - $E$  hysteresis at 0.4 Hz.

## 10. Temperature-variable PXRD (solid solution $\text{Br}_{0.80}\text{I}_{0.20}$ )

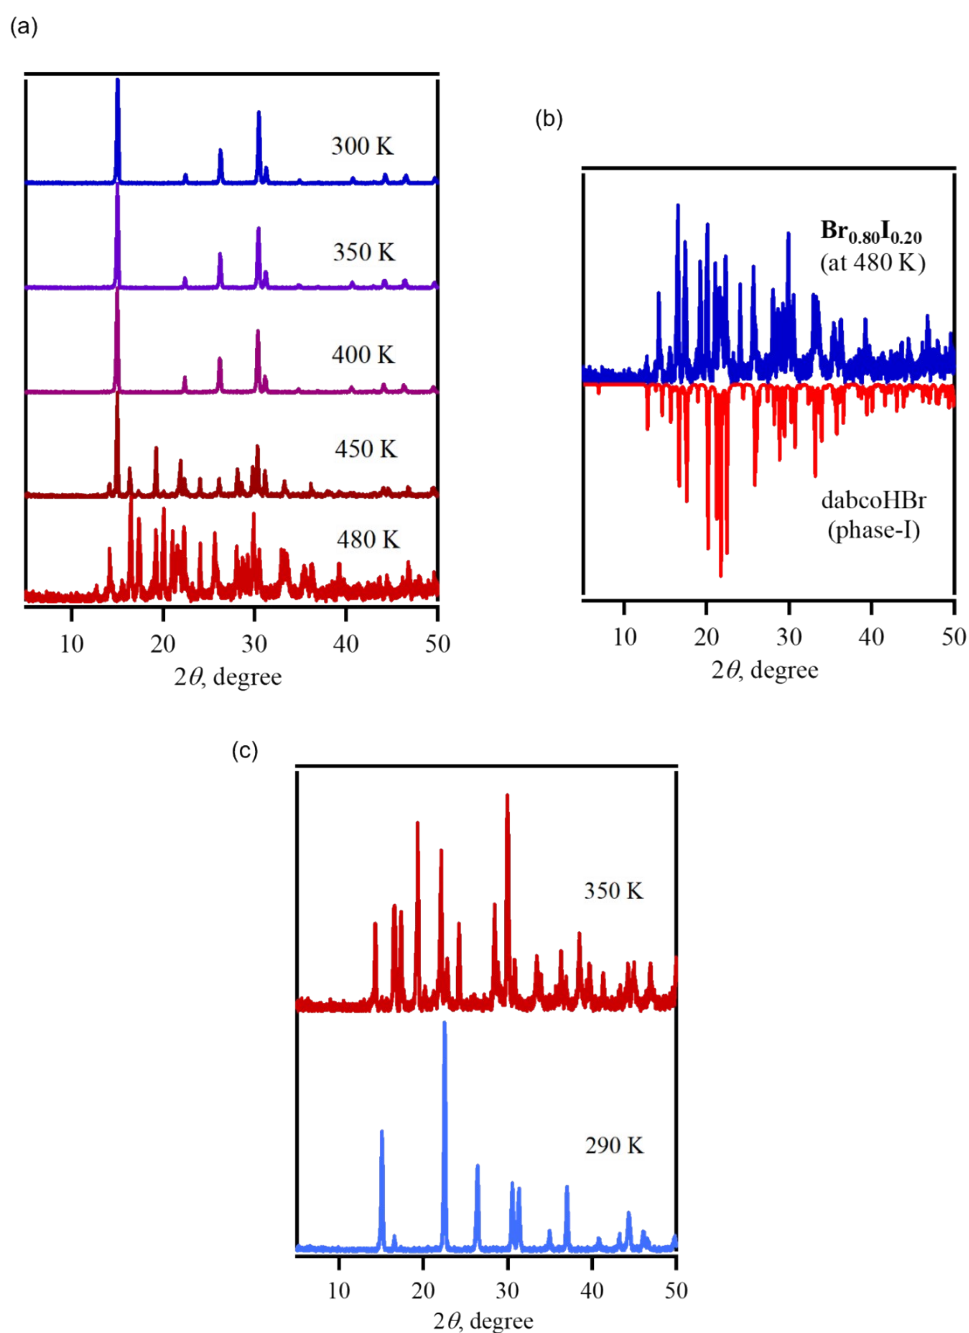

**Fig. S10** (a) Variation in the powder diffraction patterns at temperatures ranging between 300-480 K in solid solution  $\text{Br}_{0.80}\text{I}_{0.20}$  (heating process). (b) The diffraction patterns at 480 K in  $\text{Br}_{0.80}\text{I}_{0.20}$  and phase I in dabcoHBr. (c) Changes in diffraction patterns from 350 K to 290 K (cooling process).

## 11. DSC and temperature-variable PXRD (solid solution $\text{Br}_{0.19}\text{I}_{0.81}$ )

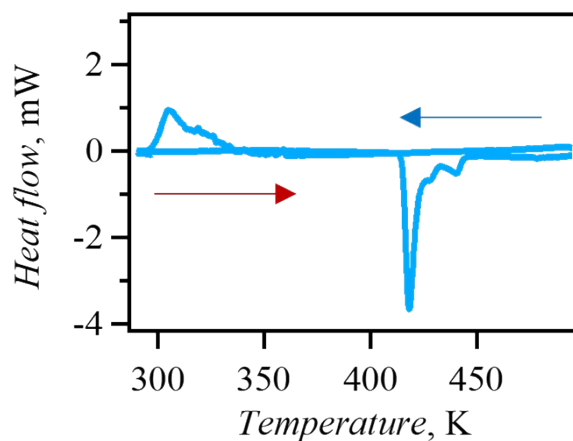

**Fig. S11** DSC of solid solution  $\text{Br}_{0.19}\text{I}_{0.81}$ . Measurements were conducted between 273–500 K, at a sweep rate of  $10 \text{ K min}^{-1}$  and under  $\text{N}_2$  atmosphere.

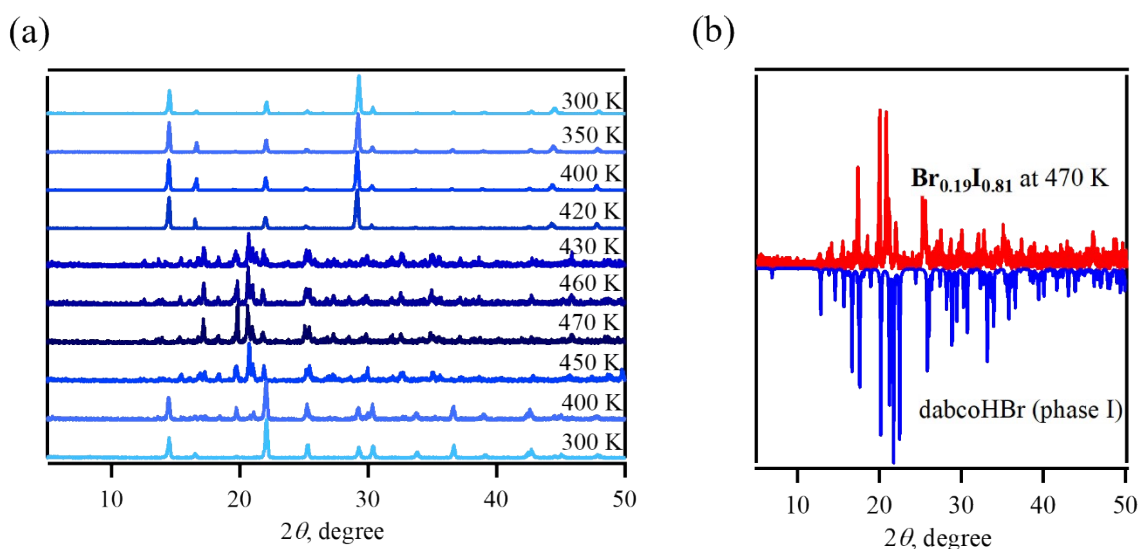

**Fig. S12** (a) Variation in the powder diffraction patterns at temperatures ranging between 300–470 K in solid solution  $\text{Br}_{0.19}\text{I}_{0.81}$ .  
(b) The diffraction patterns at 470 K in  $\text{Br}_{0.19}\text{I}_{0.81}$  and phase I in dabcoHBr.

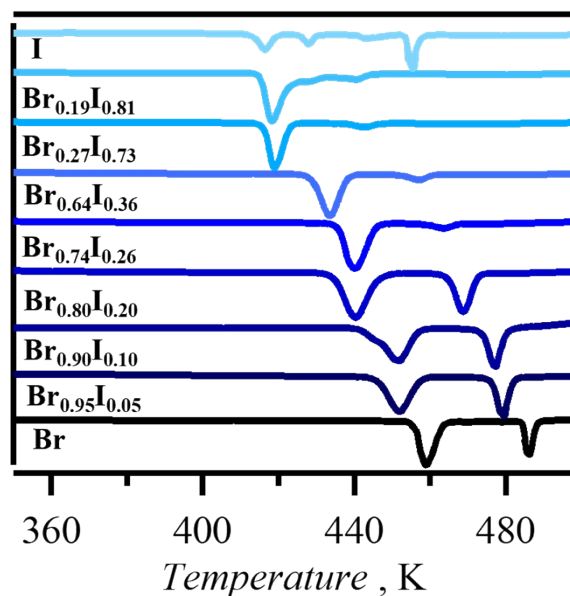

**Fig. 13** DSC of solid solution **BrI**. Measurements were conducted between 273–500 K, at a sweep rate of 10 K min<sup>-1</sup> and under N<sub>2</sub> atmosphere.

## 12. Solid solution preparation and crystal images

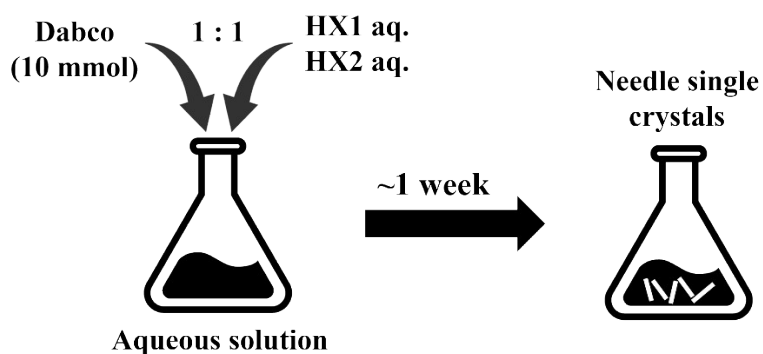

**Fig. S14** Schematic of sample preparation.

### Crystallization detail (**Cl<sub>0.03</sub>Br<sub>0.97</sub>**)

A 10 mmol of dabco was dissolved in 2 ml of water. And then, 0.20 ml of HCl<sub>aq</sub> (35.0–37.0 %) and 0.83 ml of HBr<sub>aq</sub> (47.0–49.0 %) were slowly dropped. This solution was followed to slow evaporation in dark conditions at 313 K. After a few days, colourless crystals were precipitated (yield; 44.6 %).

Crystallization detail (**Cl<sub>0.93</sub>Br<sub>0.07</sub>**)

A 10 mmol of dabco was dissolved in 2 ml of water. And then, 0.60 ml of HCl<sub>aq</sub> (35.0-37.0 %) and 0.28 ml of HBr<sub>aq</sub> (47.0-49.0 %) were slowly dropped. This solution was followed to slow evaporation in dark conditions at 313 K. After a few days, colourless crystals were precipitated (yield; 35.5 %).

Crystallization detail (**Br<sub>0.19</sub>I<sub>0.81</sub>**)

A 10 mmol of dabco was dissolved in 2 ml of water. And then, 0.28 ml of HBr<sub>aq</sub> (47.0-49.0 %) and 1.05 ml of HI<sub>aq</sub> (55.0-58.0 %) were slowly dropped. This solution was followed to slow evaporation in dark conditions at 313 K. After a few days, colourless crystals were precipitated (yield; 45.8 %).

Crystallization detail (**Br<sub>0.27</sub>I<sub>0.73</sub>**)

A 10 mmol of dabco was dissolved in 2 ml of water. And then, 0.55 ml of HBr<sub>aq</sub> (47.0-49.0 %) and 0.70 ml of HI<sub>aq</sub> (55.0-58.0 %) were slowly dropped. This solution was followed to slow evaporation in dark conditions at 313 K. After a few days, colourless crystals were precipitated (yield; 35.2 %).

Crystallization detail (**Br<sub>0.64</sub>I<sub>0.36</sub>**)

A 10 mmol of dabco was dissolved in 2 ml of water. And then, 0.72 ml of HBr<sub>aq</sub> (47.0-49.0 %) and 0.49 ml of HI<sub>aq</sub> (55.0-58.0 %) were slowly dropped. This solution was followed to slow evaporation in dark conditions at 313 K. After a few days, colourless crystals were precipitated (yield; 32.2 %).

Crystallization detail (**Br<sub>0.74</sub>I<sub>0.26</sub>**)

A 10 mmol of dabco was dissolved in 2 ml of water. And then, 0.77 ml of HBr<sub>aq</sub> (47.0-49.0 %) and 0.42 ml of HI<sub>aq</sub> (55.0-58.0 %) were slowly dropped. This solution was followed to slow evaporation in dark conditions at 313 K. After a few days, colourless crystals were precipitated (yield; 31.4 %).

Crystallization detail (**Br<sub>0.80</sub>I<sub>0.20</sub>**)

A 10 mmol of dabco was dissolved in 2 ml of water. And then, 0.83 ml of HBr<sub>aq</sub> (47.0-49.0 %) and 0.35 ml of HI<sub>aq</sub> (55.0-58.0 %) were slowly dropped. This solution was followed to slow evaporation in dark conditions at 313 K. After a few days, colourless crystals were precipitated (yield; 43.8 %).

Crystallization detail (**Br<sub>0.90</sub>I<sub>0.10</sub>**)

A 10 mmol of dabco was dissolved in 2 ml of water. And then, 0.94 ml of HBr<sub>aq</sub> (47.0-49.0 %) and 0.21 ml of HI<sub>aq</sub> (55.0-58.0 %) were slowly dropped. This solution was followed to slow evaporation in dark conditions at 313 K. After a few days, colourless crystals were precipitated (yield; 37.5 %).

Crystallization detail (**Br<sub>0.95</sub>I<sub>0.05</sub>**)

A 10 mmol of dabco was dissolved in 2 ml of water. And then, 0.99 ml of HBr<sub>aq</sub> (47.0-49.0 %) and 0.14 ml of HI<sub>aq</sub> (55.0-58.0 %) were slowly dropped. This solution was followed to slow evaporation in dark conditions at 313 K. After a few days, colourless crystals were precipitated (yield; 41.5 %).

Elemental Anal (%) in **ClBr**: C 37.407, H 6.790, and N 14.492 for the **Cl<sub>0.03</sub>Br<sub>0.97</sub>**. C 34.974, H 8.009, N 13.493 for **Cl<sub>0.93</sub>Br<sub>0.07</sub>**. **ClBr** was also investigated using halogen analysis (%) owing to its low miscibility. Cl 0.97 Br 42.30 for **Cl<sub>0.03</sub>Br<sub>0.97</sub>**. Cl 13.18 Br 8.57 for **Cl<sub>0.93</sub>Br<sub>0.07</sub>**.

Elemental Anal (%) in **BrI**: C 31.123, H 5.790, N 12.111 for **Br<sub>0.19</sub>I<sub>0.81</sub>**. C 31.687, H 5.790, N 12.308 for **Br<sub>0.27</sub>I<sub>0.73</sub>**. C 33.802, H 6.464, N 13.153 for **Br<sub>0.64</sub>I<sub>0.36</sub>**. C 34.913, H 6.423, N 13.525 for **Br<sub>0.74</sub>I<sub>0.26</sub>**. C 35.573, H 6.512, N 13.781 for **Br<sub>0.80</sub>I<sub>0.20</sub>**. C 36.239, H 6.288, N 14.200 for **Br<sub>0.90</sub>I<sub>0.10</sub>**. C 36.551, H 6.705, N 14.170 for **Br<sub>0.95</sub>I<sub>0.05</sub>**.

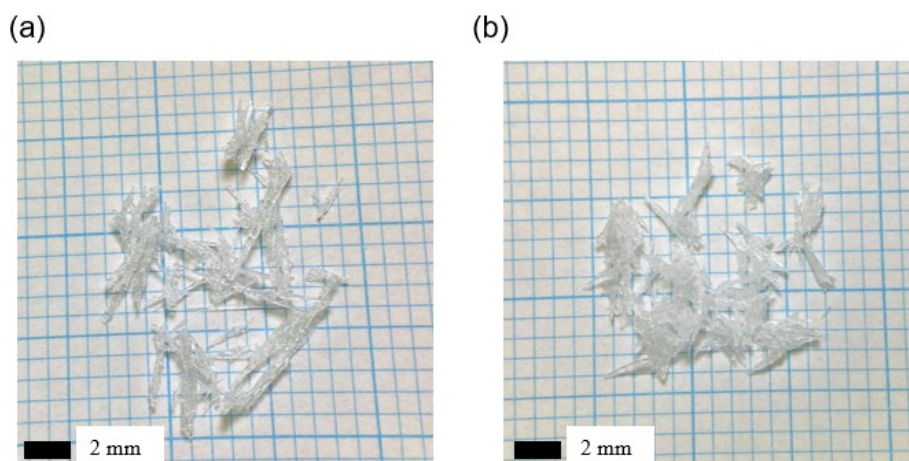

**Fig. S15** Image of solid solution crystals. (a) Solid solution **Cl<sub>0.03</sub>Br<sub>0.97</sub>**, and (b) solid **Br<sub>0.80</sub>I<sub>0.20</sub>**; the squares in the images are 1 mm<sup>2</sup>.

## Single-crystal X-ray diffraction analysis

Single-crystal analysis of **Cl<sub>0.03</sub>Br<sub>0.97</sub>**; 298 K, 2340574

**Br<sub>0.19</sub>I<sub>0.81</sub>**; 298 K, 2340566

**Br<sub>0.27</sub>I<sub>0.73</sub>**; 298 K, 2340567

**Br<sub>0.64</sub>I<sub>0.36</sub>**; 298 K, 2340568

**Br<sub>0.74</sub>I<sub>0.26</sub>**; 298 K, 2340569

**Br<sub>0.80</sub>I<sub>0.20</sub>**; 298 K, 2340570

; 112 K, 2340571

**Br<sub>0.90</sub>I<sub>0.10</sub>**; 298 K, 2340572

**Br<sub>0.95</sub>I<sub>0.05</sub>**; 298 K, 2340573

Details of the crystallographic analysis are summarised in the CIF file deposited at the CCDC.

### Reference

[1] T. Steiner, *Acta Cryst.*, 1998, **B54**, 456-463.
